# Supplementary material for: Copper(i) mediated radical polymerisation of uridine and adenosine monomers on a silica support
Source: Royal Society of Chemistry journal article supplement (doi:10.1039/b005832g), 2000-01-01
Supplement: b005832g.doc [file b005832g.doc]

## Supplementary Information

## Experimental

**General procedures:** All reactions were carried out under an atmosphere of nitrogen. Reagents were purchased from the following sources: 2-pyridinecarboxaldehyde (Avocado, 99%), pentyl amine (Aldrich, 99%), 3-aminopropylsilica (Aldrich, 1.0 mmol/g), TLC grade silica (E. Merck, Art. No. 5234256). *N*-(*n*-pentyl)-2-pyridylmethanimine (NPMI) was prepared as described previously.[[1]](#endnote-2) Me6Tren was synthesised from the commercially available tris (2-aminoethyl) amine (Aldrich, 96%) by methylation.[[2]](#endnote-3) Toluene was de-aerated by bubbling nitrogen through it prior to use. Copper (I) bromide (Avocado, 98%) was purified according to literature procedure.[[3]](#endnote-4) All solvents were purchased from BDH and were used as supplied. Column chromatography refers to flash chromatography on E. Merck silica gel (Art. No. 109385). TLC was carried out on pre-coated plates (silica gel 60 F254, E. Merck 5715) and the products were visualised using UV light or potassium permanganate dip. Silica used for immobilisation of the initiator was heated to 50 oC for 24 h in a vacuum oven prior to use.

**Analysis:** FTIR spectra were recorded on a Bruker Vector 22 spectrometer fitted with an attenuated total reflection (ATR) cell. NMR spectra were recorded on a Bruker AC300. TGA were carried out on a Perkin-Elmer thermal gravimetric analyzer TGA 7 and the samples were heated at 105 oC for 15 min. then to 800 oC at 40 oC/min. and the temperature held at 800 oC for 10 min. or until no further reduction in weight occured.

**2-Bromo-2-methylpropionic acid allyl ester, 5:**[[4]](#endnote-5) A solution of bromoisobutyroyl bromide (2.00 g, 34.4 mmol) in diethyl ether (100 ml) was cooled to 0 oC and treated dropwise with a mixture of triethylamine (3.83 g, 37.9 mmol) and allyl alcohol (2.00 g, 34.4 mmol) in diethyl ether (50 ml). When the addition was complete the reaction mixture was stirred at room temperature for 1 h, filtered and the organic phase washed with saturated sodium hydrogencarbonate (2 x 40 ml) and dried (MgSO4). The solvent was evaporated under reduces pressure then petroleum ether (40-60 oC) was added and the solution cooled to 0 oC. The solid was filtered and the solution evaporated under reduced pressure to give the pure product as a light orange oil (6.96 g, 98%). 1H NMR (CDCl3): 6.00 (1H, m), 5.43 (1H, m), 5.45 (1H, m), 4.72 (1H, d, *J* = 5.5 Hz), 1.93 (6H, s). 13C NMR (CDCl3): 171.1, 131.2, 118.3, 66.1, 55.4, 30.5 (2C).

**Addition of trimethoxysilane to 5:** To a mixture of trimethoxysilane (5.90 g, 48.3 mmol) and 2-bromo-2-methylpropionic acid allyl ester, **5** (1.00 g, 4.83 mmol) was added 9 drops of chloroplatinic acid (82 mg, 0.2 mmol) dissolved in isopropanol (5 ml). The reaction mixture was then stirred for 70 h and the trimethoxysilane evaporated under reduced pressure to give an orange oil. This was purified by Kugelrohr distillation to give the pure product, **6** as a colourless liquid (0.99 g, 62%); b.p 115 oC/0.1 mmHg. 1H NMR (CDCl3): 4.18 (2H, t, *J* = 6.9 Hz), 3.59 (9H, s), 1.93 (6H, s), 1.77 (2H, m), 0.7 (2H, m). 13C NMR (CDCl3): 172.1, 68.2, 55.6, 50.8 (3C), 31.0 (2C), 22.2, 5.5. IR, max (solid): 2944, 2841, 1733, 1463, 1277, 1160, 1079, 815 cm-1. No molecular ion peak was observed by mass spectrometry using FAB, EI or CI.

**Immobilisation of bromoisobutyrate initiator, 6 on silica:** Silica gel (1.00 g, Merck tlc grade) which was previously dried by heating at 50 oC in a vacuum oven for 3 days was suspended in dry toluene (8 ml) then **6** (0.25 g, 0.76 mmol) was added and the mixture heated at reflux for 22 h. The solution was filtered and the solid washed with toluene then methanol to give the immobilised initiator **4** as a white solid (1.14 g, 0.61 mmol/g by TGA). IR, max (solid): 1048, 797 cm-1.

**ATP of methacryloyluridine monomer 1 with amidic initiator 3 using NPMI ligand (General procedure):** Copper (I) bromide (31.4 mg, 0.219 mmol), uridine monomer **1** (1.00 g, 2.19 mmol) and amidic initiator **3** (219 mg, 0.219 mmol, 1 mmol/g) were placed in a Schlenk tube and de-aerated by pumping then purging with nitrogen three times. To this solid mixture was added a solution of NMPI ligand (77.2 mg, 0.0438 mmol) in de-aerated toluene (6 ml) and the mixture was de-aerated by four freeze-pump-thaw cycles then heated at 100 oC for 72 h. The dark red reaction mixture was filtered and washed with toluene then acetone to give the immobilised poly (5’-methacryloyluridine) as a light green solid (334 mg, 0.87 mmol/g by TGA). IR, max (solid): 3700-2800, 1683, 1457, 1385, 1272, 1048, 843, 775 cm-1.

**Copper (I) mediated radical polymerisation of methacryloyluridine monomer, 1 with amidic initiator 3 using Me6Tren ligand:** Following the general procedure with copper (I) bromide (14.3 mg, 0.10 mmol), **1** (457 m g, 1.00 mmol), amidic initiator **3** (100 mg, 0.100 mmol, 1 mmol/g), Me6Tren ligand (46.1 mg, 0.20 mmol) and de-aerated toluene (3.0 ml). The reaction mixture was heated at 110 ­oC for 22 h to give the immobilised poly (5’-methacryloyluridine) as a light green solid (148 mg, 0.80 mmol/g by TGA). IR, max (solid): 3700-2800, 1683, 1457, 1385, 1272, 1048, 843, 775 cm-1.

**Copper (I) mediated radical polymerisation of methacryloyluridine monomer, 1 with non-amidic initiator 4 using NPMI ligand:** Following the general procedure with copper (I) bromide (6.3 mg, 0.0438 mmol), uridine monomer **1** (200 mg, 0.438 mmol), amidic initiator **4** (73 mg, 0.0445 mmol, 0.61 mmol/g), NPMI ligand (15.4 mg, 0.0876 mmol) and de-aerated toluene (2.0 ml). The reaction mixture was heated at 90 ­oC for 16.5 h to give the immobilised poly (5’-methacryloyluridine) as a light green solid (210 mg, 1.51 mmol/g by TGA). IR, max (solid): 3700-2800, 1668, 1385, 1047,812, 619 cm-1.

**Copper (I) mediated radical polymerisation of methacryloyladenosine monomer, 2 with non-amidic initiator 4 using NPMI ligand:** Following the general procedure with copper (I) bromide (6.0 mg, 0.042 mmol), adenosine monomer **2** (237 mg, 0.42 mmol), initiator **4** (70 mg, 0.0427 mmol, 0.61 mmol/g), NPMI ligand (14.8 mg, 0.082 mmol) and de-aerated toluene (2.0 ml). The reaction mixture was heated at 90 ­oC for 18 h to give the immobilised poly (5’-methacryloyladenosine) as a light green solid (152 mg, 1.11 mmol/g by TGA). IR, max (solid): 2910, 2831, 1713, 1687, 1489, 1122, 839 cm-1.

**Statistical co-polymer of methacryloyluridine 1 and methacryloyladenosine 2 with initiator 4 using NPMI ligand:** Following the general procedure with copper (I) bromide (6.3 mg, 0.044 mmol), uridine monomer **1** (100 mg, 0.219 mmol), adenosine monomer **2** (123 mg, 0.219 mmol), initiator **4** (73 mg, 0.0445 mmol, 0.61 mmol/g), NPMI ligand (15.4 mg, 0.088 mmol) and de-aerated toluene (2.0 ml). The reaction mixture was heated at 100 ­oC for 70 h to give the immobilised statistical co-polymer as a light green solid (150 mg). 1H NMR of the filtrate showed a 15:85 ratio of **1**:**2** which corresponds to a loading of 1.04 mmol/g by TGA. IR, max (solid): 3215 br., 1681, 1047, 801 cm-1.

1. **References**

   ? D. M. Haddleton, M. C. Crossman, B. H. Dana, D. J. Duncalf, A. M. Heming, D. Kukulj, A. J. Shooter *Macromolecules* **1999**, *32*, 2110. [↑](#endnote-ref-2)
2. M. Campolini, N. Nardi *Inorg. Chem.* **1966**, *5*, 41. [↑](#endnote-ref-3)
3. R. N. Keller, H. D. Wycoff, *Inorg. Synth*. **1947**, *2*, 1. [↑](#endnote-ref-4)
4. R. T. Arnold, S. T. Kulenovic *J. Org. Chem.* **1978**, *43*, 3687. [↑](#endnote-ref-5)
